# Supplementary material for: Bub1-Mediated Adaptation of the Spindle Checkpoint
Source: PLOS journal article supplement (doi:10.1371/journal.pgen.1001282), 2011-01-27
Supplement: S14 (10.1371/journal.pgen.1001282.s014) [file journal.pgen.1001282.s014]

**Table S1. Strains used in this study**

| Strain | Genotype | Reference |
| --- | --- | --- |
| YPH499 | *MATa ura3-52 lys2-801 ade2-101 trp1∆63 his3∆200 leu2∆1* | [1] |
| YPH500 | *MATa* *ura3-52 lys2-801 ade2-101 trp1*∆*63 his3*∆*200 leu2*∆*1* | [1] |
| Y397 | *MATa ura3-52 lys2-801 ade2-101 trp1∆63 his3∆200 leu2∆1 BUB1-13myc:His3MX6* | [2] |
| Y1926 | *MATa ura3-52 lys2-801 ade2-101 trp1∆63 his3∆200 leu2∆1 BUB1-13myc:KanMX6* | This study |
| Y1927 | *MATa ura3-52 lys2-801 ade2-101 trp1∆63 his3∆200 leu2∆1 BUB1-T566A-13myc:KanMX6* | This study |
| Y1928 | *MATa ura3-52 lys2-801 ade2-101 trp1∆63 his3∆200 leu2∆1 bub1∆::KanMX6* | This study |
| Y1909 | *MATa ura3-52 lys2-801 ade2-101 trp1∆63 his3∆200 leu2∆1 BUB1-T566A-HIS3* | This study |
| Y2025 | *MATalpha ura3-52 his3∆200 mps1-1 BUB1-13myc:His3MX6* | This study |
| Y14 | *MATa ura3-52 lys2-801 ade2-101 trp1∆63 his3∆200 leu2∆1 cfiii(cen3.l.yph983)trp1 sup11* | P. Hieter |
| Y1929 | *MATa ura3-52 lys2-801 ade2-101 trp1∆63 his3∆200 leu2∆1 cfiii(cen3.l.yph983)trp1 sup11 bub1∆::KanMX6* | This study |
| Y1930 | *MATa ura3-52 lys2-801 ade2-101 trp1∆63 his3∆200 leu2∆1 cfiii(cen3.l.yph983)trp1 sup11 BUB1-T566A-HIS3* | This study |
| Y1913 | *MATa ura3-52 lys2-801 ade2-101 trp1∆63 his3∆200 leu2∆1 CDC28-13myc:HIS3MX6* | This study |
| Y530 | *MATa ura3-52 lys2-801 ade2-101 trp1∆63 his3∆200 leu2∆1 bub1∆::LEU2* | [3] |
| Y548 | *MATa* *ura3-52 lys2-801 ade2-101 trp1*∆*63 his3*∆*200 leu2*∆*1 bub3*∆*::kanMX6* | [2] |
| YVM112 | *MATa ura3-52 lys2-801 ade2-101 trp1∆63 his3∆200 leu2∆1*  *ctf3 ::HIS3* | [4] |
| Y1961 | *MATa ura3-52 lys2-801 ade2-101 trp1∆63 his3∆200 leu2∆1 BUB1-T566A:HIS3* | This study |
| YPH501 | *MATa/MATalpha ura3-52/ura3-52 lys2-801/lys2-80 ade2-101/ade2-101 trp1∆63/trp1∆63 his3∆200/his3∆200 leu2∆1/leu2∆1* | [1] |
| Y1931 | *MATa/MATalpha ura3-52/ura3-52 lys2-801/lys2-80 ade2-101/ade2-101 trp1∆63/trp1∆63 his3∆200/his3∆200 leu2∆1/leu2∆1 BUB1-T566A-HIS3/BUB1+* | This study |
| Y1932 | *MATa/MATalpha ura3-52/ura3-52 lys2-801/lys2-80 ade2-101/ade2-101 trp1∆63/trp1∆63 his3∆200/his3∆200 leu2∆1/leu2∆1 BUB1-T566A:HIS3/BUB1-T566A:HIS3* | This study |
| Y1963 | *MATa/MATalpha ura3-52/ura3-52 lys2-801/lys2-80 ade2-101/ade2-101 trp1∆63/trp1∆63 his3∆200/his3∆200 leu2∆1/leu2∆1 BUB1-T566A:HIS3/BUB1-T566A:HIS3* | This study |
| Y811 | *MATa/MATalpha ura3-52/ura3-52 lys2-801/lys2-80 ade2-101/ade2-101 trp1∆63/trp1∆63 his3∆200/his3∆200 leu2∆1/leu2∆1 ctf13-30/ctf13-30* | [2] |
| Y2008 | *MATa/MATalpha ura3-52/ura3-52 lys2-801/lys2-80 ade2-101/ade2-101 trp1∆63/trp1∆63 his3∆200/his3∆200 leu2∆1/leu2∆1 ctf13-30/ctf13-30 BUB1-T566A:HIS3/ BUB1-T566A:HIS3* | This study |
| Y748 | *MATa/MATalpha ura3-52/ura3-52 lys2-801/lys2-80 ade2-101/ade2-101 trp1∆63/trp1∆63 his3∆200/his3∆200 leu2∆1/leu2∆1 ctf3∆:HIS3/ctf3∆:TRP1* | This study |
| Y1933 | *MATa ura3-52 lys2-801 ade2-101 trp1∆63 his3∆200 leu2∆1 BUB1-T566A-HIS3 mad2∆::KanMX6* | This study |
| Y1934 | *MATa ura3-52 lys2-801 ade2-101 trp1∆63 his3∆200 leu2∆1 bub1-K733A-13myc:KanMX6* | This study |
| Y1910 | *MATa ura3-52 lys2-801 ade2-101 trp1∆63 his3∆200 leu2∆1 bub1-KD∆-13myc:His3MX6* | This study |
| YBS492 | *MATa ura3-1 ade2-1 his3-11,15 leu2-3,112 trp1-1 can1-100 cdc15-2 leu2::PDS1-myc18::LEU2* | [5] |
| Y2030 | *MATalpha ade2-1 trp1-1 can1-100 leu2-3,112 his3-11,15 ura3 GAL, psi+ cdc28-1N BUB1-13myc:His3MX6* | This study |
| Y1885 | *MATa trp1-1:lacO::URA GFPlacI::HIS3 Pds1-Myc18::LEU ade2-1 leu2-3,112* | [6] |
| Y2066 | *MATa trp1-1:lacO::URA GFPlacI::HIS3 Pds1-Myc18::LEU BUB1-T566A:TRP1 ade2-1 leu2-3,112* | This study |
| 17/14 | *MATa**his1* | [7] |
| 17/17 | *MATalpha his1* | [7] |

**Supplemental References**

1. Sikorski RS, Hieter P (1989) A system of shuttle vectors and yeast host strains designed for efficient manipulation of DNA in Saccharomyces cerevisiae. Genetics 122: 19-27.

2. Kitagawa K, Abdulle R, Bansal PK, Cagney G, Fields S, et al. (2003) Requirement of Skp1-Bub1 interaction for kinetochore-mediated activation of the spindle checkpoint. Mol Cell 11: 1201-1213.

3. Ohkuni K, Abdulle R, Tong AH, Boone C, Kitagawa K (2008) Ybp2 associates with the central kinetochore of Saccharomyces cerevisiae and mediates proper mitotic progression. PLoS ONE 3: e1617.

4. Pot I, Measday V, Snydsman B, Cagney G, Fields S, et al. (2003) Chl4p and iml3p are two new members of the budding yeast outer kinetochore. Mol Biol Cell 14: 460-476.

5. Palframan WJ, Meehl JB, Jaspersen SL, Winey M, Murray AW (2006) Anaphase inactivation of the spindle checkpoint. Science 313: 680-684.

6. Fernius J, Hardwick KG (2007) Bub1 kinase targets Sgo1 to ensure efficient chromosome biorientation in budding yeast mitosis. PLoS Genet 3: e213.

7. Spencer F, Gerring SL, Connelly C, Hieter P (1990) Mitotic chromosome transmission fidelity mutants in Saccharomyces cerevisiae. Genetics 124: 237-249.
